# Supplementary material for: G-Quadruplexes Formation at the Upstream Region of Replication Origin (OriL) of the Pseudorabies Virus: Implications for Antiviral Targets
Source: Viruses. 2021 Nov 4;13(11):2219. doi: 10.3390/v13112219 (PMC8623188; doi:10.3390/v13112219)
Supplement: Supplementary file 1 [file viruses-13-02219-s001.zip › viruses-1369848-si.pdf]

[illegible]

|             |              |                                           |                                               |    |
|-------------|--------------|-------------------------------------------|-----------------------------------------------|----|
| KP722022.1  | HN1201       | GGGAGAGAGGGCTGTGGGAGAGAGGGCTGTGGGAGAGAGGG | CTGTGGGAGAGAGGGCTGTGGGAGAGAGGGCTGTGGGAGAGAGGG | 88 |
| MK806387.1  | JX/CH/2016   | GGGAGAGAGGGCTGTGGGAGAGAGGGCTGTGGGAGAGAGGG | CTGTGGGAGAGAGGGCTGTGGGAGAGAGGGCTGTGGGAGAGAGGG | 86 |
| KU056477.1  |              | GGGAGAGAGGGCTGTGGGAGAGAGGGCTGTGGGAGAGAGGG | CTGTGGGAGAGAGGGCTGTGGGAGAGAGGGCTGTGGGAGAGAGGG | 86 |
| KU360259.1  | DL14/08      | GGGAGAGAGGGCTGTGGGAGAGAGGGCTGTGGGAGAGAGGG | CTGTGGGAGAGAGGGCTGTGGGAGAGAGGGCTGTGGGAGAGAGGG | 86 |
| KT824771.1  | HLJ8         | GGGAGAGAGGGCTGTGGGAGAGAGGGCTGTGGGAGAGAGGG | CTGTGGGAGAGAGGGCTGTGGGAGAGAGGGCTGTGGGAGAGAGGG | 86 |
| KJ789182.1  | TJ           | GGGAGAGAGGGCTGTGGGAGAGAGGGCTGTGGGAGAGAGGG | CTGTGGGAGAGAGGGCTGTGGGAGAGAGGGCTGTGGGAGAGAGGG | 86 |
| MT468550.1  | hSD-1/2019   | GGGAGAGAGGGCTGTGGGAGAGAGGGCTGTGGGAGAGAGGG | CTGTGGGAGAGAGGGCTGTGGGAGAGAGGGCTGTGGGAGAGAGGG | 86 |
| ML189912.1  | HNK          | GGGAGAGAGGGCTGTGGGAGAGAGGGCTGTGGGAGAGAGGG | CTGTGGGAGAGAGGGCTGTGGGAGAGAGGGCTGTGGGAGAGAGGG | 89 |
| MT94536.1   | SD18         | GGGAGAGAGGGCTGTGGGAGAGAGGGCTGTGGGAGAGAGGG | CTGTGGGAGAGAGGGCTGTGGGAGAGAGGGCTGTGGGAGAGAGGG | 86 |
| MT468549.1  | HuBXY/2018   | GGGAGAGAGGGCTGTGGGAGAGAGGGCTGTGGGAGAGAGGG | CTGTGGGAGAGAGGGCTGTGGGAGAGAGGGCTGTGGGAGAGAGGG | 86 |
| KP098534.1  | HeNI         | GGGAGAGAGGGCTGTGGGAGAGAGGGCTGTGGGAGAGAGGG | CTGTGGGAGAGAGGGCTGTGGGAGAGAGGGCTGTGGGAGAGAGGG | 85 |
| MG551316.1  | JS-2012_F50  | GGGAGAGAGGGCTGTGGGAGAGAGGGCTGTGGGAGAGAGGG | CTGTGGGAGAGAGGGCTGTGGGAGAGAGGGCTGTGGGAGAGAGGG | 86 |
| ML150583.1  | JSY7         | GGGAGAGAGGGCTGTGGGAGAGAGGGCTGTGGGAGAGAGGG | CTGTGGGAGAGAGGGCTGTGGGAGAGAGGGCTGTGGGAGAGAGGG | 86 |
| MG589642.1  | JS-2012_F120 | GGGAGAGAGGGCTGTGGGAGAGAGGGCTGTGGGAGAGAGGG | CTGTGGGAGAGAGGGCTGTGGGAGAGAGGGCTGTGGGAGAGAGGG | 86 |
| ML189914.3  | HNB          | GGGAGAGAGGGCTGTGGGAGAGAGGGCTGTGGGAGAGAGGG | CTGTGGGAGAGAGGGCTGTGGGAGAGAGGGCTGTGGGAGAGAGGG | 86 |
| KU057086.1  | HB1201       | GGGAGAGAGGGCTGTGGGAGAGAGGGCTGTGGGAGAGAGGG | CTGTGGGAGAGAGGGCTGTGGGAGAGAGGGCTGTGGGAGAGAGGG | 90 |
| QJ0809329.1 | DUL34qfp     | GGGAGAGAGGGCTGTGGGAGAGAGGGCTGTGGGAGAGAGGG | CTGTGGGAGAGAGGGCTGTGGGAGAGAGGGCTGTGGGAGAGAGGG | 86 |
| MH582511.1  | GD0304       | GGGAGAGAGGGCTGTGGGAGAGAGGGCTGTGGGAGAGAGGG | CTGTGGGAGAGAGGGCTGTGGGAGAGAGGGCTGTGGGAGAGAGGG | 86 |
| KX423960.1  | Ea_Hubei_    | GGGAGAGAGGGCTGTGGGAGAGAGGGCTGTGGGAGAGAGGG | CTGTGGGAGAGAGGGCTGTGGGAGAGAGGGCTGTGGGAGAGAGGG | 86 |
| MT949537.1  | HuB17        | GGGAGAGAGGGCTGTGGGAGAGAGGGCTGTGGGAGAGAGGG | CTGTGGGAGAGAGGGCTGTGGGAGAGAGGGCTGTGGGAGAGAGGG | 86 |
| KU154340.1  | Ea           | GGGAGAGAGGGCTGTGGGAGAGAGGGCTGTGGGAGAGAGGG | CTGTGGGAGAGAGGGCTGTGGGAGAGAGGGCTGTGGGAGAGAGGG | 86 |
| KJ717942.1  | Kaplan       | GGGAGAGAGGGCTGTGGGAGAGAGGGCTGTGGGAGAGAGGG | CTGTGGGAGAGAGGGCTGTGGGAGAGAGGGCTGTGGGAGAGAGGG | 86 |
| KQ09330.1   | DUL34Pass    | GGGAGAGAGGGCTGTGGGAGAGAGGGCTGTGGGAGAGAGGG | CTGTGGGAGAGAGGGCTGTGGGAGAGAGGGCTGTGGGAGAGAGGG | 72 |
| QJ0809328.1 | Kaplan       | GGGAGAGAGGGCTGTGGGAGAGAGGGCTGTGGGAGAGAGGG | CTGTGGGAGAGAGGGCTGTGGGAGAGAGGGCTGTGGGAGAGAGGG | 86 |
| JF797218.1  | Kaplan       | GGGAGAGAGGGCTGTGGGAGAGAGGGCTGTGGGAGAGAGGG | CTGTGGGAGAGAGGGCTGTGGGAGAGAGGGCTGTGGGAGAGAGGG | 86 |
| BK001744.1  |              | GGGAGAGAGGGCTGTGGGAGAGAGGGCTGTGGGAGAGAGGG | CTGTGGGAGAGAGGGCTGTGGGAGAGAGGGCTGTGGGAGAGAGGG | 86 |
| MK618718.1  | AnH1/CHN2015 | GGGAGAGAGGGCTGTGGGAGAGAGGGCTGTGGGAGAGAGGG | CTGTGGGAGAGAGGGCTGTGGGAGAGAGGGCTGTGGGAGAGAGGG | 56 |
| MK080279.1  | HLJ-2013     | GGGAGAGAGGGCTGTGGGAGAGAGGGCTGTGGGAGAGAGGG | CTGTGGGAGAGAGGGCTGTGGGAGAGAGGGCTGTGGGAGAGAGGG | 71 |
| AF018925.1  | MY-1         | GGGAGAGAGGGCTGTGGGAGAGAGGGCTGTGGGAGAGAGGG | CTGTGGGAGAGAGGGCTGTGGGAGAGAGGGCTGTGGGAGAGAGGG | 86 |
| KU552118.1  | LA           | GGGAGAGAGGGCTGTGGGAGAGAGGGCTGTGGGAGAGAGGG | CTGTGGGAGAGAGGGCTGTGGGAGAGAGGGCTGTGGGAGAGAGGG | 86 |
| RM189913.1  | Fa           | GGGAGAGAGGGCTGTGGGAGAGAGGGCTGTGGGAGAGAGGG | CTGTGGGAGAGAGGGCTGTGGGAGAGAGGGCTGTGGGAGAGAGGG | 26 |
| LC342744.1  | RC1          | GGGAGAGAGGGCTGTGGGAGAGAGGGCTGTGGGAGAGAGGG | CTGTGGGAGAGAGGGCTGTGGGAGAGAGGGCTGTGGGAGAGAGGG | 41 |
| Consensus   |              | GGGAGAGAGGGCTGTGGGAGAGAGGGCTGTGGGAGAGAGGG | CTGTGGGAGAGAGGGCTGTGGGAGAGAGGGCTGTGGGAGAGAGGG |    |

Figure S1. The conserved G-core sequence of OriL-S (A) and OriL-A (B), these sequences were derived from NCBI ([www.ncbi.nlm.nih.gov](http://www.ncbi.nlm.nih.gov)), and MEGA6 software was used for multiple sequences alignment. The consensus G-core sequence was labeled with red.
